# Supplementary material for: A conjugated hyperbranched polymer constructed from carbazole and tetraphenylethylene moieties: convenient synthesis through one-pot “A2 + B4” Suzuki polymerization, aggregation-induced enhanced emission, and application as explosive chemosensors and PLEDs
Source: Royal Society of Chemistry journal article supplement (doi:10.1039/c2jm16514g), 2012-01-01
Supplement: c2jm16514g.pdf [file c2jm16514g.pdf]

## Electronic Supplementary Information:

### A Conjugated Hyperbranched Polymer Constructed by Carbazole and Tetraphenylethylene Moieties: convenient Synthesis through One-Pot “A<sub>2</sub>+B<sub>4</sub>” Suzuki Polymerization, Aggregation-Induced Enhanced Emission, and Application as Explosive Chemosensors and PLED

Wenbo Wu, Shanghui Ye, Lijin Huang, Li Xiao, Yingjie Fu, Qi Huang, Gui Yu, Yunqi Liu,\*  
Jingui Qin, Qianqian Li and Zhen Li\*

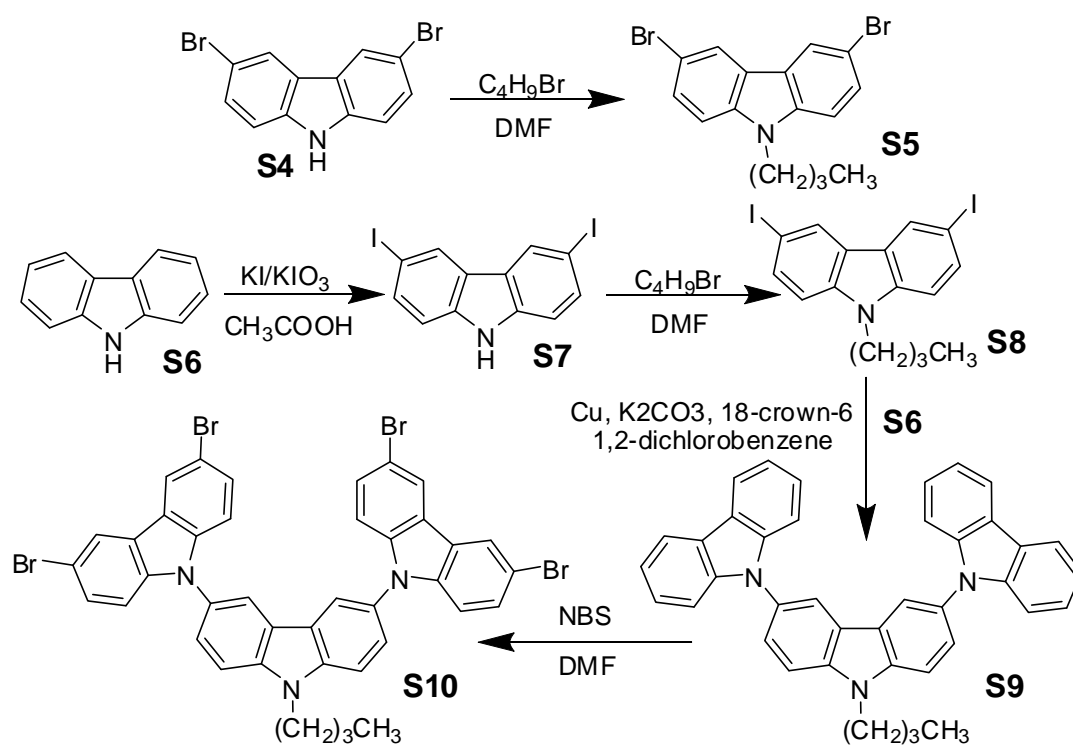

**Scheme S1** Synthesis of carbazole-based monomers **S5** and **S10**.

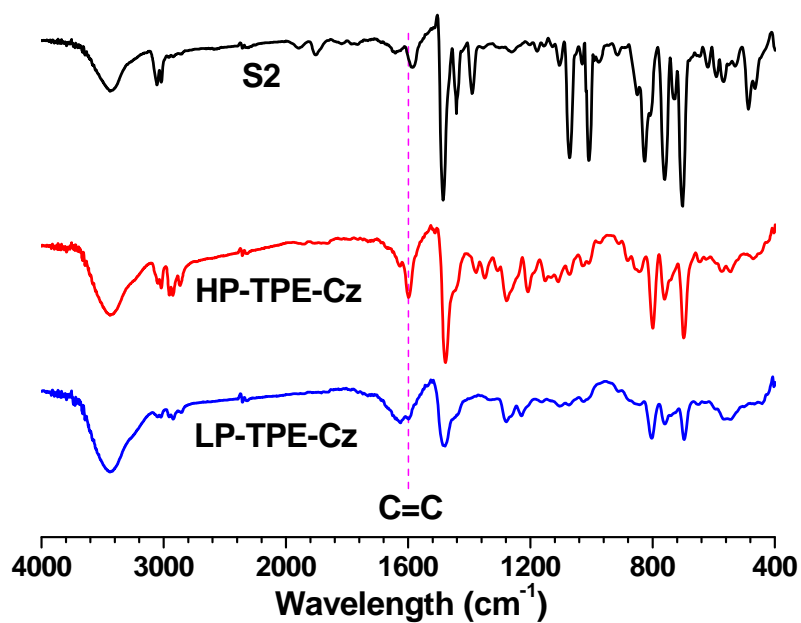

Fig. S1 The FT-IR spectra of **HP-TPE-Cz**, **LP-TPE-Cz** and compound **S2**.

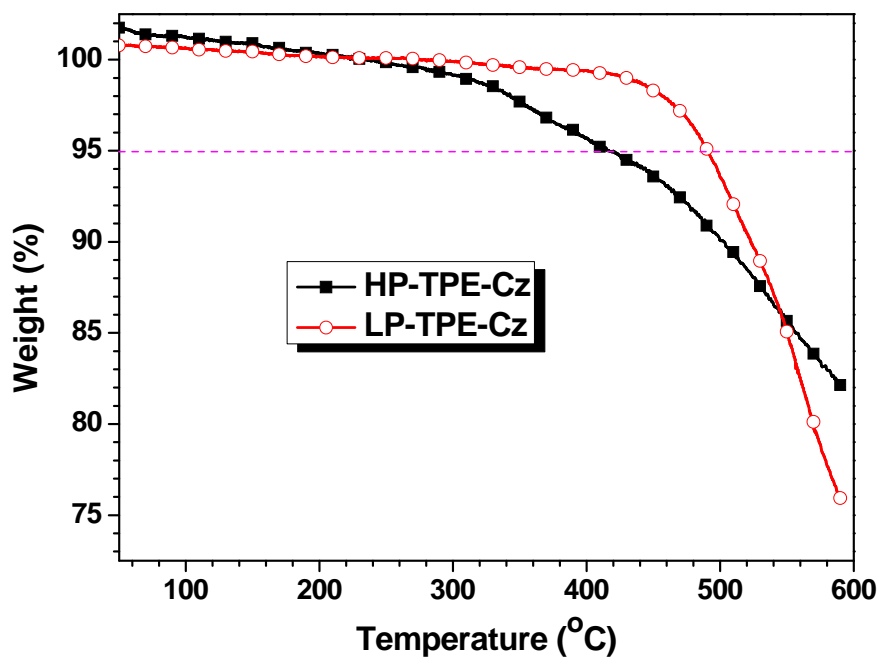

Fig. S2 TGA thermograms of these two polymers **HP-TPE-Cz** and **LP-TPE-Cz**, measured in nitrogen at a heating rate of 10 °C/min.

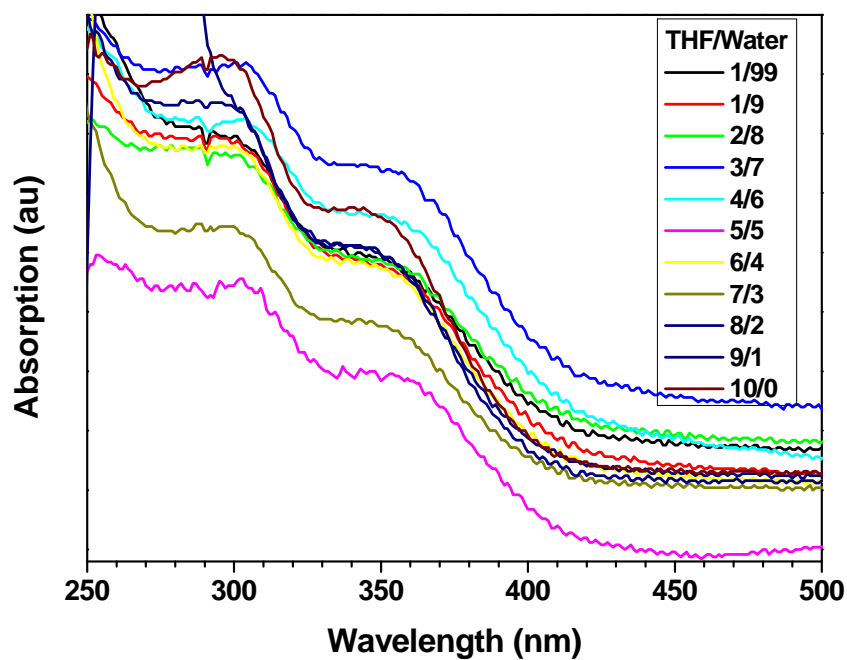

Fig. S3 UV-Vis spectra of **HP-TPE-Cz** in THF and THF/water mixtures. ( $2.0 \times 10^{-3}$  mg/mL).

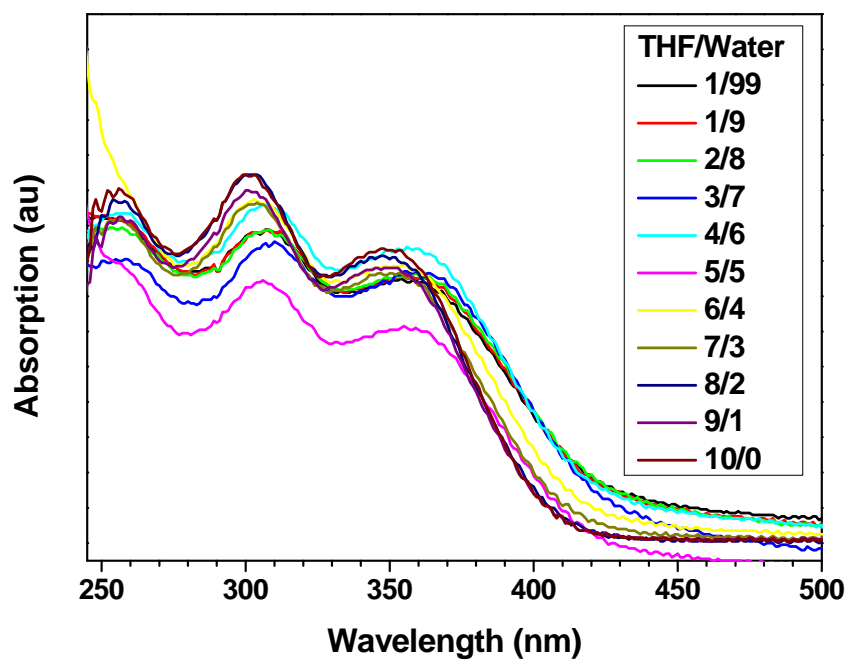

Fig. S4 UV-Vis spectra of **LP-TPE-Cz** in THF and THF/water mixtures. ( $2.0 \times 10^{-3}$  mg/mL).

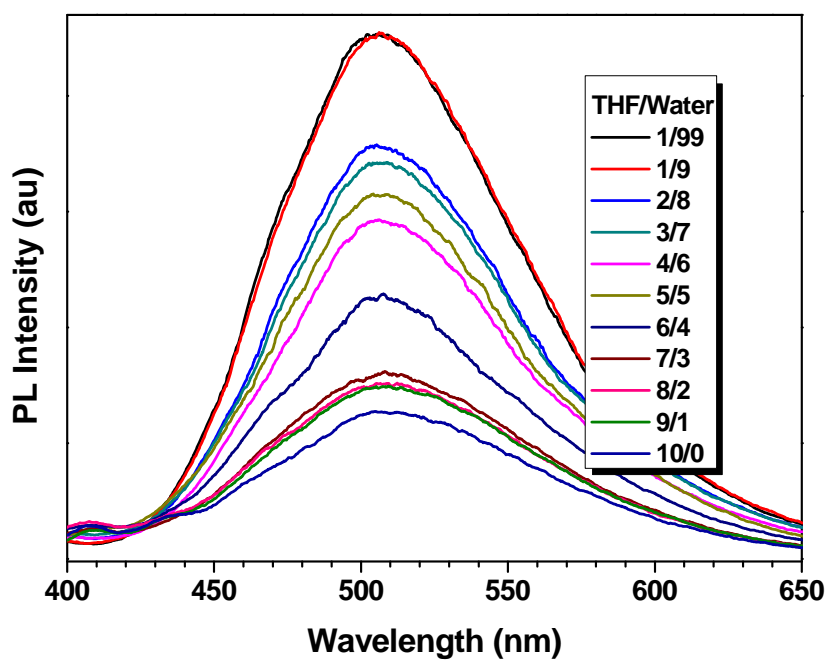

**Fig. S5** Photoluminescence (PL) spectra of **LP-TPE-Cz** in THF and THF/water mixtures. ( $2.0 \times 10^{-3}$  mg/mL  $\lambda_{\text{ex}} = 350$  nm).

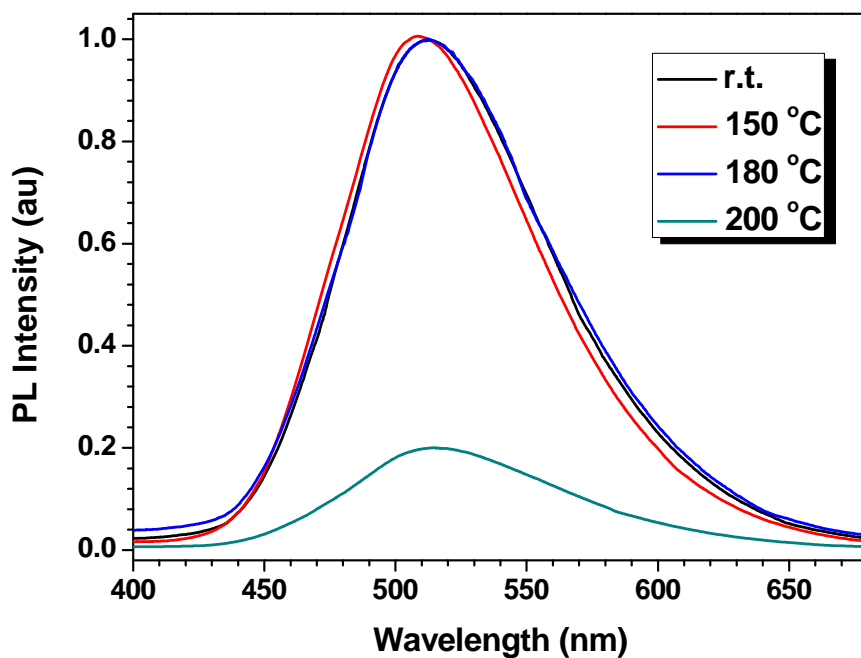

**Fig. S6** Photoluminescent spectra of the films of **HP-TPE-Cz** before and after annealing at different temperatures for 30 min in air.

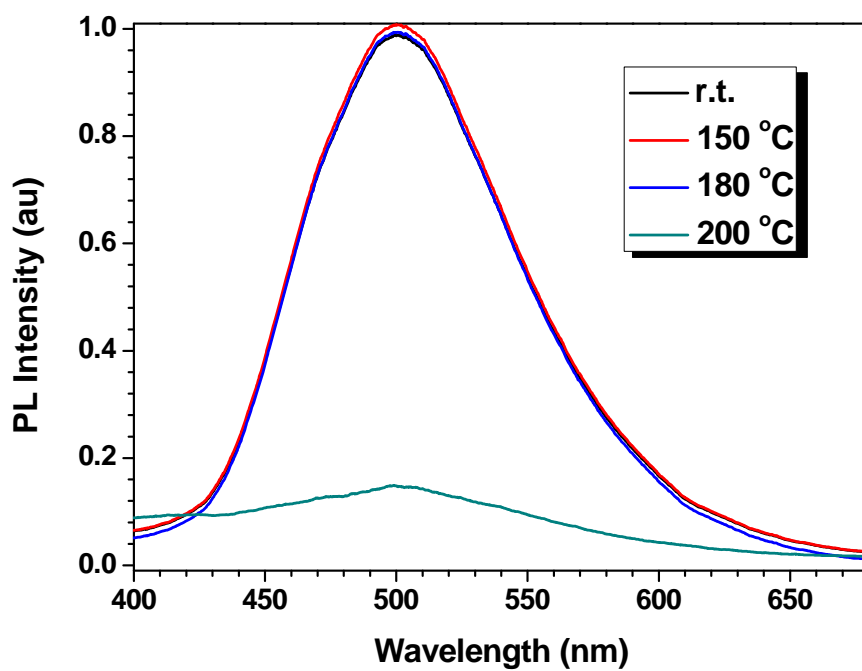

**Fig. S7** Photoluminescent spectra of the films of **LP-TPE-Cz** before and after annealing at different temperatures for 30 min in air.

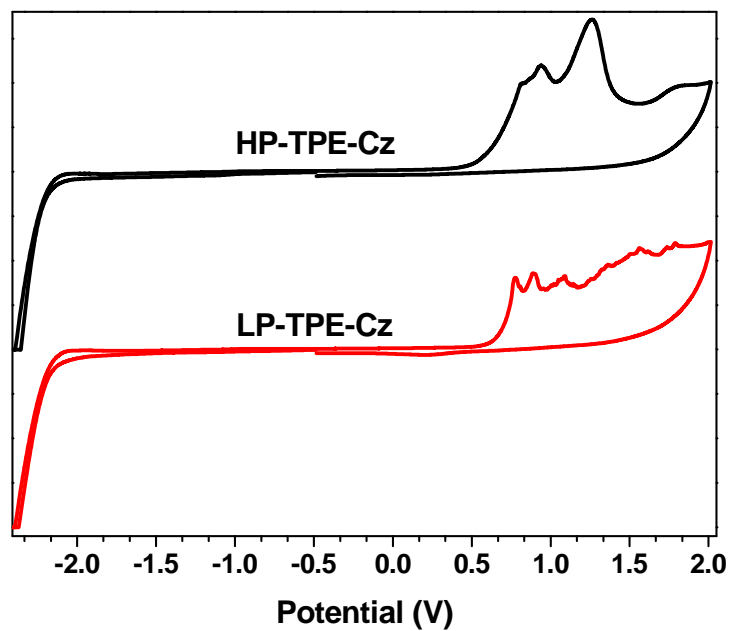

**Fig. S8** Cyclic voltammograms of the polymers films on Pt working electrode.

**Table S1.** Electrochemical Properties of Hyperbranched Polymers

| no.              | $E_g^{\text{opt}}$<br>(eV) <sup>a</sup> | $E_{\text{onset(ox)}}$<br>(V) vs Fc <sup>b</sup> | $E_{\text{HOMO}}$<br>(eV) <sup>c</sup> | $E_{\text{LUMO}}$<br>(eV) <sup>d</sup> |
|------------------|-----------------------------------------|--------------------------------------------------|----------------------------------------|----------------------------------------|
| <b>HP-TPE-Cz</b> | 2.66                                    | 0.60                                             | -5.40                                  | -2.74                                  |
| <b>LP-TPE-Cz</b> | 2.63                                    | 0.70                                             | -5.50                                  | -2.87                                  |

<sup>a</sup> Band gaps obtained from absorption edge ( $E_g = 1240/\lambda_{\text{onset}}$ ). <sup>b</sup>  $E_{\text{Fc}} = 0.48$  V vs Ag/AgCl. <sup>c</sup>  $E_{\text{HOMO}} = -(E_{\text{onset(ox),FOC}} + 4.8)$  eV. <sup>d</sup>  $E_{\text{LUMO}} = (E_{\text{HOMO}} + E_g^{\text{opt}})$  eV.

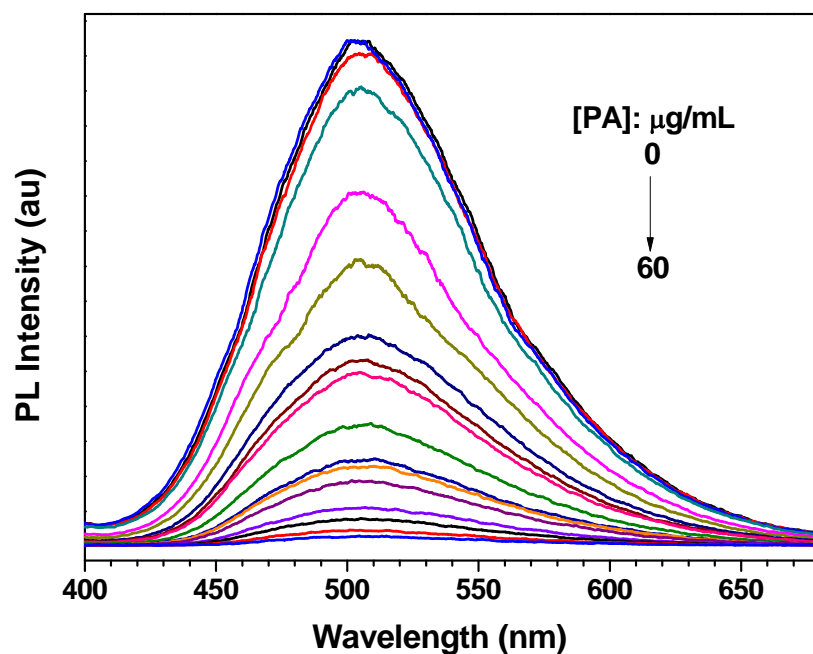

**Fig. S9** PL spectra of LP-TPE-Cz in THF/water mixture (1:9 v/v  $2.0 \times 10^{-3}$  mg/mL) containing different amounts of picric acid (PA).

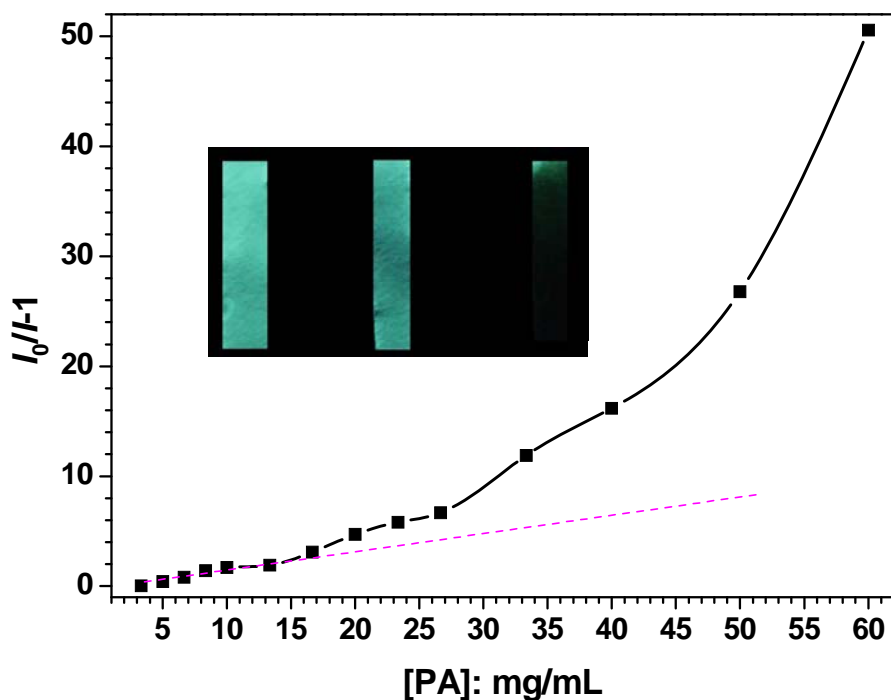

**Fig. S10** PA concentration effect on the PL peak intensity of **LP-TPE-Cz** in THF/water mixture (1:9 v/v  $2.0 \times 10^{-3}$  mg/mL), where  $I$  = peak intensity and  $I_0$  = peak intensity at [PA]=0 mg/mL. Inset: fluorescence images of **LP-TPE-Cz** samples adsorbed in the filter papers before (the left one), after (the middle one) being partially dipped into pure toluene and after (the right one) being partially dipped into a toluene solution of PA (80  $\mu\text{g/mL}$ ).
